# Supplementary material for: Imaging Predictive Factors of Abdominal Aortic Aneurysm Growth
Source: MDPI journal article supplement (doi:10.3390/jcm10091917), 2021-04-28
Supplement: s1 [file s1]

Table S1. The quality of observational studies was assessed using the Newcastle-Ottawa Scale (NOS)

| Study                                  | Selection | Comparability | Outcome |
|----------------------------------------|-----------|---------------|---------|
| Wolf, <i>et al.</i> <sup>16</sup>      | ****      | *             | **      |
| Faggioli, <i>et al.</i> <sup>17</sup>  | ****      | *             | *       |
| Veldenz, <i>et al.</i> <sup>18</sup>   | ****      | *             | ***     |
| Kurvers, <i>et al.</i> <sup>19</sup>   | ****      | *             | * **    |
| Lindholt, <i>et al.</i> <sup>20</sup>  | ****      | **            | *       |
| Speelman, <i>et al.</i> <sup>21</sup>  | ****      | **            | ***     |
| Badger, <i>et al.</i> <sup>22</sup>    | ****      | *             | ***     |
| Shang, <i>et al.</i> <sup>23</sup>     | **        | *             | *       |
| Farsad, <i>et al.</i> <sup>24</sup>    | *         | *             | *       |
| George, <i>et al.</i> <sup>25</sup>    | ****      | **            | ***     |
| Hendy, <i>et al.</i> <sup>26</sup>     | ****      | **            | ***     |
| Huang, <i>et al.</i> <sup>27</sup>     | ***       | *             | *       |
| Joly, <i>et al.</i> <sup>28</sup>      | **        | *             | ***     |
| Lindquist, <i>et al.</i> <sup>29</sup> | ****      | **            | ***     |
| Nakayama, <i>et al.</i> <sup>30</sup>  | ***       | **            | ***     |
| Woloszko, <i>et al.</i> <sup>31</sup>  | ****      | **            | ***     |
| Behr, <i>et al.</i> <sup>32</sup>      | ****      | **            | ***     |
| Forsythe, <i>et al.</i> <sup>33</sup>  | ***       | **            | ***     |
| MARS investigators <sup>34</sup>       | ****      | **            | ***     |
| Nyronning, <i>et al.</i> <sup>35</sup> | ****      | *             | ***     |
| Tzirakis, <i>et al.</i> <sup>36</sup>  | **        | *             | *       |
| Hirata, <i>et al.</i> <sup>37</sup>    | ***       | **            | *       |
| Zhu, <i>et al.</i> <sup>38</sup>       | ***       | **            | ***     |
